# Supplementary material for: TiO2 passivation for improved efficiency and stability of ZnO nanorods based perovskite solar cells
Source: Royal Society of Chemistry journal article supplement (doi:10.1039/c6ra12126h), 2016-01-01
Supplement: c6ra12126h1.pdf [file c6ra12126h1.pdf]

Supporting information

**TiO<sub>2</sub> passivation for improved efficiency and stability of ZnO nanorods based  
perovskite solar cells**

Peng Chen, Xingtian Yin\*, Meidan Que, Yawei Yang, Wenxiu Que\*

Electronic Materials Research Laboratory, Key Laboratory of the Ministry of Education, International  
Center for Dielectric Research, School of Electronic & Information Engineering, Xi'an Jiaotong  
University, Xi'an 710049, Shaanxi, People's Republic of China

\*Corresponding author: [xt\\_yin@mail.xjtu.edu.cn](mailto:xt_yin@mail.xjtu.edu.cn), [wxque@mail.xjtu.edu.cn](mailto:wxque@mail.xjtu.edu.cn)

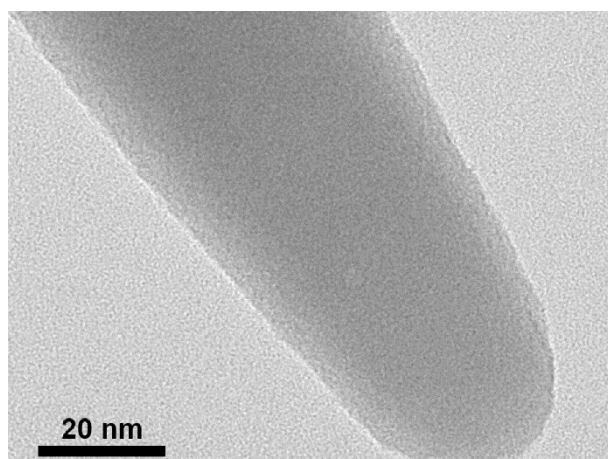

Figure S1 TEM image of bare ZnO nanorod.

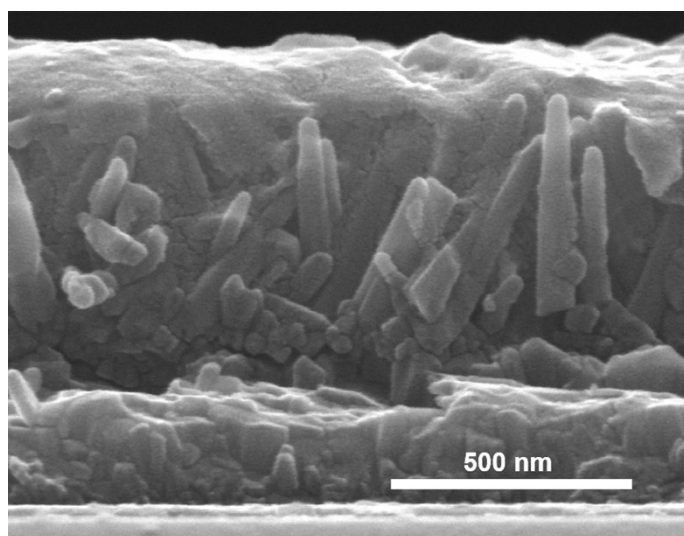

Figure S2 Cross-sectional SEM image of the MAPbI<sub>3</sub> film on nanorods with 150,000 $\times$  magnification.

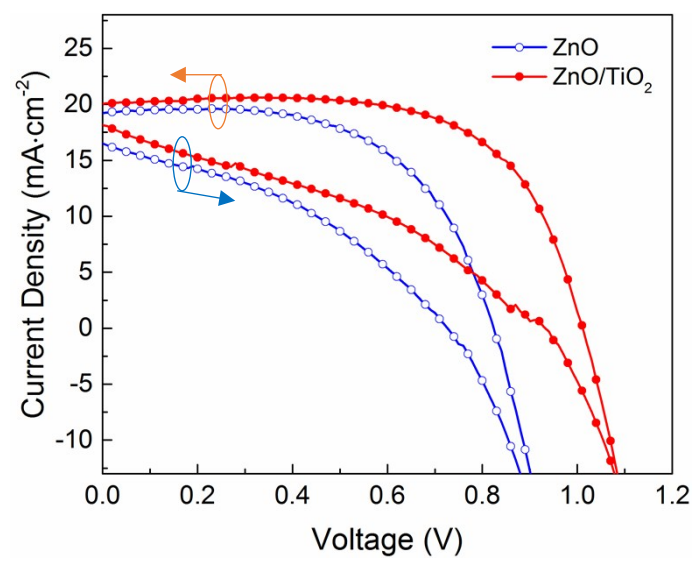

Figure S3 Current density-voltage curves of PSCs device measured by forward and reverse scans.
